# Supplementary material
Source: Frontiers journal article supplement (https://www.frontiersin.org/articles/418410)
Supplement: Table_1.XLS [file Table_1.XLS]

## Sheet: Fe-S containging proteins
Supplementary Dataset 1. Fe-S Cluster Containing Proteins in Arabidopsis
Short name	AGI code	Localizationa	Fe-S cluster typeb	Full name annotation
24-kDa	AT4G02580	Mitochondria	[2Fe-2S]	NADH:ubiquinone oxidoreductase (Complex I); Fe-S binding proteins of peripheral arm
51-kDa	AT5G08530	Mitochondria	[4Fe-4S], FMN	NADH:ubiquinone oxidoreductase (Complex I); Fe-S binding proteins of peripheral arm
75-kDa	AT5G37510	Mitochondria	[2Fe-2S], 2x[4Fe-4S]	NADH:ubiquinone oxidoreductase (Complex I); Fe-S binding proteins of peripheral arm
AAO1	AT5G20960	Cytosol	2x[2Fe-2S], FAD, Mococ	Aldehyde oxidase, last step of abscisic acid biosynthesis (AAO3)
AAO2	AT3G43600	Cytosol	2x[2Fe-2S], FAD, Mococ	Aldehyde oxidase, last step of abscisic acid biosynthesis (AAO3)
AAO3	AT2G27150	Cytosol	2x[2Fe-2S], FAD, Mococ	Aldehyde oxidase, last step of abscisic acid biosynthesis (AAO3)
AAO4	AT1G04580	Cytosol	2x[2Fe-2S], FAD, Mococ	Aldehyde oxidase, last step of abscisic acid biosynthesis (AAO3)
ABCE1 (RLI1)	AT3G13640	Cytosol (P)	2x[4Fe-4S]b	ABC transporter E family member; involved in ribosome assembly (by similarity)
ABCE2 (RLI2)	AT4G19210	Cytosol (P)	3x[4Fe-4S]b	ABC transporter E family member; involved in ribosome assembly (by similarity)
ACO1	AT4G35830	Cytosol	[4Fe-4S]	Aconitase, aconitate hydratase
ACO2	AT4G26970	Mitochondria	[4Fe-4S]	Aconitase, aconitate hydratase
ACO3	AT2G05710	Mitochondria	[4Fe-4S]	Aconitase, aconitate hydratase
ADX1/MFDX2*	AT4G21090	Mitochondria	[2Fe-2S]	Adrenodoxin / mitochondrial ferredoxin
ADX2/MFDX1*	AT4G05450	Mitochondria	[2Fe-2S]	Adrenodoxin / mitochondrial ferredoxin
Alpha-helical ferredoxin*	AT1G16700	Mitochondria	2x[4Fe-4S]	NADH:ubiquinone oxidoreductase (Complex I); Fe-S binding proteins of peripheral arm
Alpha-helical ferredoxin*	AT1G79010	Mitochondria	2x[4Fe-4S]	NADH:ubiquinone oxidoreductase (Complex I); Fe-S binding proteins of peripheral arm
Apr1	AT4G04610	Plastids	[4Fe-4S]	Adenosine 5’-phosphosulfate (APS) reductase, first step of reductive sulfite assimilation
Apr2	AT1G62180	Plastids	[4Fe-4S]	Adenosine 5’-phosphosulfate (APS) reductase, first step of reductive sulfite assimilation
Apr3	AT4G21990	Plastids	[4Fe-4S]	Adenosine 5’-phosphosulfate (APS) reductase, first step of reductive sulfite assimilation
ATASE1	AT2G16570	Plastids	[4Fe-4S]b	Gln phosphoribosyl pyrophosphate amido-transferase, also called amidophosphoribosyl
ATASE2	AT4G34740	Plastids	[4Fe-4S]b	Gln phosphoribosyl pyrophosphate amido-transferase, also called amidophosphoribosyl
ATASE3	AT4G38880	Unknown	[4Fe-4S]b	Transferase, or GPAT; involved in purine biosynthesis
BIO2	AT2G43360	Mitochondria	[2Fe-2S], [4Fe–4S]	Biotin synthase
CAO	AT1G44446	Plastidenvelope	Rieske [2Fe-2S]	Chlorophyllide a oxygenase
DJC77	AT2G42750	Plastids	[4Fe-4S]b	Chloroplast DnaJ protein; CDJ3 and CDJ4 have been reported from Chlamydomonas reinhardtii; the At homologues are uncharacterized.
DJC82	AT3G05345	Plastids	[4Fe-4S]b	Chloroplast DnaJ protein; CDJ3 and CDJ4 have been reported from Chlamydomonas reinhardtii; the At homologues are uncharacterized.
DJC76	AT5G23240	Plastids	[4Fe-4S]b	Chloroplast DnaJ protein; CDJ3 and CDJ4 have been reported from Chlamydomonas reinhardtii; the At homologues are uncharacterized.
CFR1	AT2G39670	Cytosol	[4Fe-4S]b	Radical SAM superfamily protein; putative ribosomal RNA large subunit methyltransferase (related to Cfr/RlmN)
CFR2	AT3G19630	Cytosol	[4Fe-4S]b	Radical SAM superfamily protein; putative ribosomal RNA large subunit methyltransferase(related to Cfr/RlmN)
CMO	AT4G29890	Plastids	Rieske [2Fe-2S]	Choline monooxygenase, involved in betaine synthesis in spinach; uncharacterized in Arabidopsis
CNX2	AT2G31955	Mitochondria	[4Fe-4S]b	First step of Mococ biosynthesis; radical SAM enzyme
DHAD	AT3G23940	Plastids (P)	[4Fe-4S] in E.coli enzyme; [2Fe-2S] in spinach	Dihydroxyacid dehydratase, homologous to bacterial IlvD; uncharacterized in Arabidopsis
DME	AT5G04560	Nucleus	[4Fe-4S]b	Encodes a DNA glycosylase DEMETER (DME). Responsible for endosperm maternal-allele-specific hypomethylation at the MEDEA (MEA) gene
DML1(ROS1)	AT2G36490	Nucleus	[4Fe-4S]b	A repressor of transcriptional gene silencing. Functions by demethylating the target promoter DNA
DML2	AT3G10010	Nucleus	[4Fe-4S]b	Encodes a protein with DNA glycosylase activity that is involved in maintaining methylation marks
DML3	AT4G34060	Nucleus	[4Fe-4S]b	Encodes a protein with 5-meC and thymine-DNA glycosylase activity with a preference for CpG and CpHpG sequences. Involved in maintaining methylation marks
DNA helicase	AT1G20720	Nucleus	[4Fe-4S]b	Homologues of human FANCJ, related to RAD3/XPD; uncharacterized in Arabidopsis. See also RAD3 below.
DNA helicase	AT1G20750	Nucleus	[4Fe-4S]b	Homologues of human FANCJ, related to RAD3/XPD; uncharacterized in Arabidopsis. See also RAD3 below.
DNA helicase	AT1G79890	Nucleus (P)	[4Fe-4S]b	Homologue of human CHLR involved in sister chromatid pairing; uncharacterized in plants.
RTEL1	AT1G79950	Nucleus	[4Fe-4S]b	Regulator of Telomere Elongation Helicase1, RTEL1; Homologues of human FANCJ, related to RAD3/XPD; uncharacterized in Arabidopsis. See also RAD3 below.
POLA3	AT1G67320	Nucleus (P)	[4Fe-4S]b	Large subunit of DNA polymerase:primase that synthesizes small RNA primers during discontinuous DNA replication.
DPH2	AT3G59630	Nucleus (P)	[4Fe-4S]b	Homologue of Saccharomyces cerevisiae Dph2; putative radical SAM enzyme involved in diphthamide biosynthesis, a histidine modification on EF2 (elongation factor), which is the target of Diphtheria toxin.
DPH1	AT5G62030	Nucleus (P)	[4Fe-4S]b	Homologue of Saccharomyces cerevisiae Dph1; putative radical SAM enzyme involved in diphthamide biosynthesis, a histidine modification on EF2 (elongation factor), which is the target of Diphtheria toxin.
DRE2/CIAPIN1*	AT5G18400	Cytosol (P)	[2Fe-2S], [4Fe-4S]b	Homologue of human CIAPIN1
DWARF27A	AT1G03055	Plastids (rice homologue)	[2Fe-2S]?	beta-carotene isomerase D27-like protein; homologue of the characterized rice gene Os11g37650 involved in strigolactone biosynthesis.
DWARF27B	AT1G64680	Plastids (rice homologue)	[2Fe-2S]?	beta-carotene isomerase D27-like protein; homologue of the characterized rice gene Os11g37650 involved in strigolactone biosynthesis.
ELP3	AT5G50320	Nucleus	[4Fe-4S]b	Component of elongator complex; radical SAM protein
ETF:QO	AT2G43400	Mitochondria	[4Fe-4S], FAD	Electron-Transfer Flavoprotein: Ubiquinone Oxidoreductase
FD1 (PETF2)	AT1G10960	Plastids	[2Fe-2S]	Ferredoxin (see Adrenodoxin for mitochondrial ferredoxins)
FD2 (PETF)	AT1G60950	Plastids	[2Fe-2S]	Ferredoxin (see Adrenodoxin for mitochondrial ferredoxins)
FD3	AT2G27510	Plastids	[2Fe-2S]	Ferredoxin (see Adrenodoxin for mitochondrial ferredoxins)
FD4	AT5G10000	Plastids	[2Fe-2S]	Ferredoxin (see Adrenodoxin for mitochondrial ferredoxins)
﻿FTR	AT2G04700	Plastids	[4Fe-4S]	Ferredoxin:thioredoxin reductase, β-subunit (FTRC)
GLT1	AT5G53460	Plastids	2x[4Fe-4S]b, FAD [3Fe-4S] FMN	Glutamate synthase [NADH] (NADH-GOGAT)
GLU1	AT5G04140	Plastids	[3Fe-4S], FMN	Glutamate synthase [Fd] (Fd-GOGAT)
GLU2	AT2G41220	Mitochondria	[3Fe-4S], FMN	Glutamate synthase [Fd] (Fd-GOGAT)
GRXS14*	AT3G54900	Plastids	[2Fe-2S]	Glutathione-dependent redoxins/ 2Fe-2S transfer
GRXS15*	AT3G15660	Mitochondria	[2Fe-2S]	Glutathione-dependent redoxins/ Glutaredoxin
GRXS16*	AT2G38270	Plastids	[2Fe-2S]	Glutathione-dependent redoxins/ 2Fe-3S transfer
GRXS17*	AT4G04950	Cytosol, nucleus	[2Fe-2S]	A monothiol glutaredoxin that is a critical component involved in ROS accumulation, auxin signaling, and temperature-dependent postembryonic growth in plants
HCAR	AT1G04620	Plastids	2x[4Fe-4S]	Degradation of light-harvesting complexes and is necessary for efficient photosynthesis by balancing the chlorophyll a/b ratio
HCF101*	AT3G24430	Plastids	[4Fe-4S]	Mutant displays high chlorophyll fluorescence; protein is required for PSI assembly and FTR
HemN	AT5G63290	Mitochondria (P)	[4Fe-4S]b	Coproporphyrinogen oxidase-related; radical SAM enzyme; uncharacterized.
INDH*	AT4G19540	Mitochondria	[4Fe-4S]b	Homologue of IND1, Iron-sulfur protein required for NADH Dehydrogenase
IPMI (IIL1)	AT4G13430	Plastids	[4Fe-4S]b	3-isopropylmalate isomerase or IPM dehydratase, the 2nd step in leucine biosynthesis. Also involved in glucosinolate biosynthesis in Arabidopsis.
SUFA/CpIscA*	AT1G10500	Plastids Mitochondria (P)	[4Fe-4S]	IscA1 / SufA Fe-S carrier protein
ISCA2/ISA1*	AT2G16710	Plastids Mitochondria (P)	[4Fe-4S]	IscA1 / SufA Fe-S carrier protein
ISCA(SUFA)-like*	AT2G36260	Plastids Mitochondria (P)	[4Fe-4S]	IscA1 / SufA Fe-S carrier protein
ISCA4*	AT5G03905	Plastids Mitochondria (P)	[4Fe-4S]	IscA1 / SufA Fe-S carrier protein
ISPG	AT5G60600	Plastids	[4Fe-4S]	4-hydroxy-3-methylbut-2-enyl diphosphate synthase, involved in isoprenoid biosynthesis
ISU1/IscU1*	AT4G22220	Mitochondria	[4Fe-4S]	Iron-sulfur scaffold protein
ISU2*	AT3G01020	Mitochondria	[4Fe-4S]	Iron-sulfur scaffold protein
ISU3*	AT4G04080	Mitochondria	[4Fe-4S]	Iron-sulfur scaffold protein
LIP1	AT2G20860	Mitochondria	2x[4Fe-4S]	Lipoic acid synthase; radical SAM enzyme
LIP1p	AT5G08415	Plastids	2x[4Fe-4S]	Lipoic acid synthase; radical SAM enzyme
MIAB	AT4G36390	Mito/Plastids (P)	2x[4Fe-4S]	Homologue of E.coli MiaB; radical SAM enzyme
MitoNEET	AT5G51720	Mitochondria, inter membrane space (P)	[2Fe-2S]b, with 3 Cys and 1 His ligands	Homologue of human MitoNEET; uncharacterized in Arabidopsis
MOM1/MOM	AT1G08060	Nucleus	[2Fe-2S]	Transcriptional silencer
MTAB	AT1G72090	Cytosol, endoplasmic reticulum	2x[4Fe-4S]	Methylthiotransferase, involved in tRNA methylthiolation
NAR1/GOLLUM*	AT4G16440	Cytosol	2x[4Fe-4S]b	[FeFe]-hydrogenase-like protein involved in the assembly of cytosolic/nuclear Fe-S proteins
NBP35*	AT5G50960	Cytosol	stable [4Fe-4S] and labile bridged [4Fe-4S]	Nucleotide-binding protein 35 kDa; Fe-S scaffold
NdhI	ATCG01090	Plastids	2x[4Fe-4S]	NAD(P)H dehydrogenase complex
NdhK	ATCG00430	Plastids	[4Fe-4S]	NAD(P)H dehydrogenase complex
NFU1*	AT4G01940	Plastids	[2Fe-2S]or [4Fe-4S]	NifU-like protein, functioning as Fe-S scaffold protein or Fe-S carrier protein
NFU2/CnfU*	AT5G49940	Plastids	[2Fe-2S]or [4Fe-4S]	NifU-like protein, functioning as Fe-S scaffold protein or Fe-S carrier protein
NFU3*	AT4G25910	Plastids	[2Fe-2S]or [4Fe-4S]	NifU-like protein, functioning as Fe-S scaffold protein or Fe-S carrier protein
NFU4/NFU-III*	AT3G20970	Mitochondria	[2Fe-2S]or [4Fe-4S]	NifU-like protein, functioning as Fe-S scaffold protein or Fe-S carrier protein
NFU5*	AT1G51390	Mitochondria	[2Fe-2S] or [4Fe-4S]	NifU-like protein, functioning as Fe-S scaffold protein or Fe-S carrier protein
NIR1	AT2G15620	Plastids	[4Fe-4S], sirohaem	Nitrite reductase
NTH1	AT2G31450	Nucleus	[4Fe-4S]b	Endonuclease III homologue
PAO	AT3G44880	Plastids	Rieske [2Fe-2S]	Pheophorbide a oxygenase, involved in chlorophyll breakdown. Other names: LLS1,ACD1
PetC	AT4G03280	Plastid, thylakoids	Rieske [2Fe-2S]	Rieske protein of cytochrome b6f complex
POL2A(TIL1)	AT1G08260	Nucleus	[4Fe-4S]b	DNA polymerase epsilon catalytic subunit
POL2B	AT2G27120	Nucleus	[4Fe-4S]b	A protein with similarity to DNA polymerase epsilon catalytic subunit
POLA1(ICU2)	AT5G67100	Nucleus	[4Fe-4S]b	Putative catalytic subunit of the DNA polymerase alpha
POLD1(GIS5)	AT5G63960	Nucleus	[4Fe-4S]b	Catalytic subunits of DNA polymerase δ
PsaA	ATCG00350	Plastid,thylakoids	[4Fe-4S] bridged between psaA andpsaB, known as FX	Photosystem I subunits
PsaB	ATCG00340	Plastid,thylakoids	[4Fe-4S] bridged between psaA and psaB, known as FX	Photosystem I subunits
PsaC	ATCG01060	Plastid,thylakoids	2x[4Fe-4S] in psaC (FA,FB)	Photosystem I subunits
PSST (20-kDa)	AT5G11770	Mitochondria	[4Fe-4S]	NADH:ubiquinone oxidoreductase (Complex I); Fe-S binding proteins of peripheral arm
PTC52	AT4G25650	Plastids	Rieske [2Fe-2S]b	Similar to ACD1. Leaves of antisense ACD1-like plants turn yellow in darkness like wild-type whereas antisense ACD1 plants remain dark after five days of dark treatment.
RAD3 (UVH6)	AT1G03190	Nucleus	[4Fe-4S]b	DNA repair helicase (XPD-like)
REV3	AT1G67500	Nucleus	[4Fe-4S]b	Catalytic subunit of DNA polymerase zeta
Rieske protein	AT5G13430	Mitochondria	Rieske [2Fe-2S]	Rieske subunit of ubiquinol cytochrome c reductase (complex III); See also petC
Rieske protein	AT5G13440	Mitochondria	Rieske [2Fe-2S]	Rieske subunit of ubiquinol cytochrome c reductase (complex III); See also petC
RlmN	AT1G60230	Mitochondria (P)	[4Fe-4S]b	Homologue of E.coli RlmN, involved in rRNA modification; radical SAM enzyme
RPAC43	AT1G60620	Nucleus	[4Fe-4S]b	RNA polymerase I and III, subunit D
RPAC42	AT1G60850	Nucleus	[4Fe-4S]b	RNA polymerase I and III, subunit D
ROL5/ Ncs6p	AT2G44270	Cytosol	[3Fe-4S]	Catalyze the formation of 2-thiouridine (s2U)
RUMA	AT3G27180	Plastids	[4Fe-4S]b	putative plastid RNA methyltransferase; S-adenosyl-L-methionine-dependent methyltransferase superfamily protein
RUMA(TRM2A)	AT3G21300	Cytosol	[4Fe-4S]b	tRNA METHYLTRANSFERASE 2A, RNA methyltransferase family protein
SDH2-1	AT3G27380	Mitochondria	[2Fe-2S], [3Fe-4S], [4Fe-4S]	Subunit of succinate dehydrogenase (complex II)
SDH2-2	AT5G40650	Mitochondria	[2Fe-2S], [3Fe-4S], [4Fe-4S]	Subunit of succinate dehydrogenase (complex II)
SDH2-3	AT5G65165	Mitochondria	[2Fe-2S], [3Fe-4S], [4Fe-4S]	Subunit of succinate dehydrogenase (complex II)
SIR1	AT5G04590	Plastids	[4Fe-4S], sirohaem	Sulfite reductase, β-subunit
SIRB	AT1G50170	Plastids	[2Fe-2S]	Sirohydrochlorin ferrochelatase; last step of sirohaem biosynthesis
SUFB/NAP1*	AT4G04770	Plastids	[4Fe-4S]b	Other names: ABCI8, NAP1, LAF6; part of SUFBCD complex involved in Fe-S cluster assembly.
SUFE3-NADA*	AT5G50210	Plastids	[4Fe-4S]	Quinolinate synthase (NADA) required for NAD cofactor biosynthesis, with N-terminal SUFE domain.
THIC	AT2G29630	Plastids	[4Fe-4S]	Thiamine biosynthesis; radical SAM enzyme
TIC55	AT2G24820	Plastid	Rieske [2Fe-2S]	Protein associated with the translocon at the inner envelope membrane of chloroplasts
TtcA	AT1G76170	Cytosol	[3Fe-4S]	homologue of ROL5 2-thiocytidine tRNA biosynthesis protein
TYW1	AT1G75200	Cytosol?	[4Fe-4S]b, FMN	Required for tRNA wybutosine modification in yeast; uncharacterized radical SAM enzyme in Arabidopsis
XDH1	AT4G34890	Cytosol	2x[2Fe-2S], FAD, Mococ	Xanthine dehydrogenase; involved in purine catabolism
XDH2	AT4G34900	Cytosol	2x[2Fe-2S], FAD, Mococ	Xanthine dehydrogenase; involved in purine catabolism
* Involved in Fe-S protein biogenesis
a (P), predicted
b In most cases, there is no doubt that the Arabidopsis protein binds an Fe-S cluster of the indicated type, even though direct
evidence (spectroscopy) is lacking. Indirect evidence could be enzyme activity, for example, when this is known to depend on
the Fe-S cofactor. When there is no experimental evidence at all, the type of cluster is based on sequence similarity with Fe-S
binding homologues in other organisms, including the Fe-S- binding residues (usually cysteines). This is indicated by (b).
c Molybdenum cofactor
